# Supplementary material for: A Virtual Breakthrough Series Collaborative for Missed Test Results: A Stepped-Wedge Cluster-Randomized Clinical Trial
Source: PubMed Central journal article supplement (PMC11525607; doi:10.1001/jamanetworkopen.2024.40269), 2024-10-30
Supplement: jamanetwopen-e2440269-s003.pdf [file jamanetwopen-e2440269-s003.pdf]

## Data Sharing Statement

Zubkoff. A Virtual Breakthrough Series Collaborative for Missed Test Results. *JAMA Netw Open*. Published October 30, 2024. doi:10.1001/jamanetworkopen.2024.40269

### Data

**Additional Information:** Clinicaltrials.gov: NCT04166240

**Data available:** No
